# Supplementary material for: The Microbiota Mediates Pathogen Clearance from the Gut Lumen after Non-Typhoidal Salmonella Diarrhea
Source: PubMed Central journal article supplement (PMC2936549; doi:10.1371/journal.ppat.1001097), 2010-09-09
Supplement: ppat.1001097.s010.pdf [file ppat.1001097.s010.pdf]

## Supplemental Figures

### **The microbiota mediates pathogen clearance from the gut lumen after non-typhoidal *Salmonella* diarrhea**

Kathrin Endt\*<sup>1</sup>, Bärbel Stecher\*<sup>1</sup>, Samuel Chaffron<sup>2</sup>, Emma Slack<sup>3</sup>, Nicolas Tchitchek<sup>4</sup>, Arndt Benecke<sup>4</sup>, Laurye Van Maele<sup>5</sup>, Jean-Claude Sirard<sup>5</sup>, Andreas J. Mueller<sup>1</sup>, Mathias Heikenwalder<sup>6</sup>, Andrew J. Macpherson<sup>3</sup>, Richard Strugnell<sup>7</sup>, Christian von Mering<sup>2</sup> and Wolf-Dietrich Hardt<sup>1#</sup>

**Table S1. Bacterial strains and Plasmids used in this study**

| Strain                              | Genotype and antibiotic resistance                                                                                                | Phenotype                                                                                                       | Source or reference    |
|-------------------------------------|-----------------------------------------------------------------------------------------------------------------------------------|-----------------------------------------------------------------------------------------------------------------|------------------------|
| <i>S. tm</i> <sup>wt</sup>          | <i>S. tm</i> strain SL1344;<br>strep <sup>R</sup>                                                                                 | <i>S.typhimurium</i> wild type                                                                                  | [1]                    |
| <i>S. tm</i> <sup>att</sup> (M556)  | SL1344 <i>sseD::aphT</i> ;<br>strep <sup>R</sup> , km <sup>R</sup>                                                                | Induces gut inflammation via the SPI-1 TTSS; Lacks SPI-2 TTSS; attenuated in systemic infection                 | [2]                    |
| <i>S. tm</i> <sup>ΔO</sup>          | SL1344Δ <i>wbaP</i> ; strep <sup>R</sup>                                                                                          | No O-antigen                                                                                                    | [3]                    |
| <i>S. tm</i> <sup>avir</sup> (M557) | SL1344 Δ <i>invG</i><br><i>sseD::aphT</i> , strep <sup>R</sup> , km <sup>R</sup>                                                  | Lacks functional SPI-1 and SPI-2 TTSS; does not induce gut inflammation and is attenuated in systemic infection | [2]                    |
| M933                                | SL1344 Δ <i>invG</i> ;<br><i>sseD::aphT</i> ;<br><i>fliGHI::Tn10</i> ; strep <sup>R</sup> ,<br>km <sup>R</sup> , tet <sup>R</sup> | Lacks functional SPI-1, SPI-2 TTSS and flagella biosynthesis (no flagellin produced)                            | [4]                    |
| <i>S.en</i> wt                      | <i>S.en</i> strain 125109;<br>strep <sup>R</sup>                                                                                  | <i>S.enteritidis</i> wild type                                                                                  | [5]                    |
| <i>S.en</i> <sup>att</sup> (M1512)  | <i>S.en</i> 125109<br>Δ <i>ssaV::cat</i> ; strep <sup>R</sup> , cm <sup>R</sup>                                                   | Induces gut inflammation via the SPI-1 TTSS; Lacks SPI-2 TTSS; attenuated in systemic infection                 | [5]                    |
| <i>S.en</i> <sup>avir</sup> (M1513) | <i>S.en</i> 125109<br><i>invC::aphT</i> ; <i>ssaV::cat</i> ;<br>strep <sup>R</sup> , km <sup>R</sup> , cm <sup>R</sup>            | Lacks functional SPI-1 and SPI-2 TTSS; does not induce gut inflammation and is attenuated in systemic infection | [5]                    |
| <i>Escherichia coli</i>             | <i>Nissle 1917 strain</i> ; wild type                                                                                             |                                                                                                                 | Kind gift of Dr. Sören |

|                              |                                                                         |                                                                                                                                     |                            |
|------------------------------|-------------------------------------------------------------------------|-------------------------------------------------------------------------------------------------------------------------------------|----------------------------|
|                              |                                                                         |                                                                                                                                     | Schubert                   |
| <i>Lactobacillus reuteri</i> | <i>Wild type</i>                                                        | Mouse gut isolate                                                                                                                   | [6]                        |
| <i>Enterococcus faecalis</i> | <i>Wild type</i>                                                        | Mouse gut isolate                                                                                                                   | This study                 |
| <b>Plasmid</b>               | <b>Genotype and antibiotic resistance</b>                               | <b>Phenotype</b>                                                                                                                    | <b>Source or reference</b> |
| pM979                        | P <sub>rpsM</sub> <i>gfpmut2</i><br><i>ori</i> pBR322; amp <sup>R</sup> | Constitutive <i>gfp</i> expression                                                                                                  | [7]                        |
| pM973                        | P <sub>ssaG</sub> <i>gfpmut2 ori</i> pMB1<br>amp <sup>R</sup>           | Intracellular <i>gfp</i> expression;<br>Indicator for Salmonella<br>invaded into the gut mucosa;<br>Used for 'challenge infections' | [8]                        |
| pWKS30                       | amp <sup>R</sup> ; <i>ori</i> pMB1                                      |                                                                                                                                     | [9]                        |
