# Supplementary material for: The Microbiota Mediates Pathogen Clearance from the Gut Lumen after Non-Typhoidal Salmonella Diarrhea
Source: PubMed Central journal article supplement (PMC2936549; doi:10.1371/journal.ppat.1001097), 2010-09-09
Supplement: ppat.1001097.s011.pdf [file ppat.1001097.s011.pdf]

**Table S2. Mice used in this study**

| <b>Name</b>                   | <b>genetic background</b> | <b>microbiota*</b>            | <b>colonization resistance</b> | <b>source or reference</b> |
|-------------------------------|---------------------------|-------------------------------|--------------------------------|----------------------------|
| Wild type mice (C)            | C57BL/6                   | specific pathogen free<br>(C) | yes                            | Rodent center HCl (RCHCl)  |
| TCR $\beta^{-/-}\delta^{-/-}$ | C57BL/6                   | specific pathogen free<br>(C) | yes                            | [10]                       |
| JHT                           | C57BL/6                   | specific pathogen free<br>(C) | yes                            | [11]                       |
| IgA <sup>-/-</sup>            | C57BL/6                   | specific pathogen free<br>(C) | yes                            | [12]                       |
| pIgR <sup>-/-</sup>           | C57BL/6                   | specific pathogen free<br>(C) | yes                            | [13]                       |
| L (LCM)                       | C57BL/6                   | low complexity<br>microbiota  | no                             | [14]                       |

\*C= conventional, specified pathogen free microbiota.
