# Supplementary material for: The Microbiota Mediates Pathogen Clearance from the Gut Lumen after Non-Typhoidal Salmonella Diarrhea
Source: PubMed Central journal article supplement (PMC2936549; doi:10.1371/journal.ppat.1001097), 2010-09-09
Supplement: ppat.1001097.s012.pdf [file ppat.1001097.s012.pdf]

1 **Table S3. Pathways significantly over-represented among the differentially expressed genes**  
2 **in the cecal mucosa of L-mice at day 40 p.i. with *S. tm*<sup>att</sup>**

3

4

Supplemental Table 3

## B-cell- and antibody-mediated immunity

| PROBE  | LOG_Q[090514_J-K_ind.ma2] | VAR[090514_J-K_ind.ma2] | P[090514_J-K_ind.ma2] | Celera Gene ID                                   | Gene_Symbol                                      | Gene_Name                                                                                                                                                                  |
|--------|---------------------------|-------------------------|-----------------------|--------------------------------------------------|--------------------------------------------------|----------------------------------------------------------------------------------------------------------------------------------------------------------------------------|
| 429239 | 5.93180                   | 0.93180                 | 0.00000               | mCG56372.2                                       | LOC432699                                        | null                                                                                                                                                                       |
| 339582 | 4.26380                   | 0.89670                 | 0.00000               | mCG1440410                                       | Igh-1a LOC544908                                 | immunoglobulin heavy chain 1a (serum IgG2a)                                                                                                                                |
| 590082 | 4.13340                   | 0.85190                 | 0.00000               | mCG141789.1                                      | Igk-V32                                          | immunoglobulin kappa chain variable 32 (V32)                                                                                                                               |
| 808065 | 3.99290                   | 1.80190                 | 0.00000               | mCG130744.2 mCG1036427.2                         | LOC635601 bd2 LOC628027                          | null                                                                                                                                                                       |
| 736226 | 3.97930                   | 1.02240                 | 0.00000               | mCG1027522.1 mCG1029835.1                        | LOC636462                                        | null                                                                                                                                                                       |
| 401576 | 3.90870                   | 1.76620                 | 0.00000               | mCG132002.2                                      | LOC243439                                        | null                                                                                                                                                                       |
| 891891 | 3.85240                   | 1.34100                 | 0.00000               | mCG113660.1                                      | LOC633515                                        | null                                                                                                                                                                       |
| 538665 | 3.83340                   | 0.58660                 | 0.00000               | null                                             | LOC434031 Igk-V38                                | immunoglobulin kappa chain variable 38(V38)                                                                                                                                |
| 491036 | 3.77740                   | 0.84550                 | 0.00000               | mCG116913.1                                      | LOC636067                                        | null                                                                                                                                                                       |
| 699266 | 3.77400                   | 0.76790                 | 0.00000               | mCG1025451.1                                     | null                                             | null                                                                                                                                                                       |
| 742698 | 3.74840                   | 0.88410                 | 0.00000               | mCG130744.2 mCG1036427.2 mCG1036498.2            | LOC635664 LOC635601 bd2 LOC628056 LOC628027      | null                                                                                                                                                                       |
| 493584 | 3.71590                   | 0.98470                 | 0.00000               | mCG142153.1                                      | LOC620105 LOC637047                              | null                                                                                                                                                                       |
| 411187 | 3.70140                   | 0.56530                 | 0.00000               | null                                             | LOC620017                                        | null                                                                                                                                                                       |
| 348117 | 3.67230                   | 0.45770                 | 0.00000               | mCG1036432.2                                     | null                                             | null                                                                                                                                                                       |
| 857940 | 3.65340                   | 1.28650                 | 0.00000               | mCG1037662.1                                     | LOC630251                                        | null                                                                                                                                                                       |
| 715331 | 3.64830                   | 0.51560                 | 0.00000               | mCG141621.1                                      | LOC434037                                        | null                                                                                                                                                                       |
| 901486 | 3.64130                   | 1.45140                 | 0.00000               | mCG68149.2                                       | LOC630331 LOC633472                              | null                                                                                                                                                                       |
| 596021 | 3.63320                   | 1.11870                 | 0.00000               | mCG146921.1 mCG141794.1 mCG141802.1              | IgM                                              | null                                                                                                                                                                       |
| 574582 | 3.58730                   | 1.10810                 | 0.00000               | mCG146921.1 mCG141794.1                          | IgM                                              | null                                                                                                                                                                       |
| 515370 | 3.58010                   | 1.03810                 | 0.00000               | mCG142162.1                                      | LOC626145 LOC545854                              | null                                                                                                                                                                       |
| 444829 | 3.55200                   | 1.23660                 | 0.00000               | mCG141790.1                                      | Gm1067                                           | gene model 1067, (NCBI)                                                                                                                                                    |
| 489583 | 3.43750                   | 0.72290                 | 0.00000               | mCG114300.1                                      | null                                             | null                                                                                                                                                                       |
| 479671 | 3.42090                   | 0.74830                 | 0.00000               | mCG126269.2 mCG1036505.2                         | gn33 Igk-V34 Igk-V33                             | immunoglobulin kappa chain variable 34 (V34) immunoglobulin kappa chain variable 33 (V33)                                                                                  |
| 896758 | 3.41680                   | 0.08000                 | 0.00000               | mCG1037964.1                                     | LOC620216 LOC632220                              | null                                                                                                                                                                       |
| 583890 | 3.36590                   | 0.47530                 | 0.00000               | mCG117763.1                                      | LOC634652 LOC382695 LOC436124                    | null                                                                                                                                                                       |
| 919480 | 3.30590                   | 0.97960                 | 0.00000               | mCG141784.1                                      | LOC434025                                        | null                                                                                                                                                                       |
| 675426 | 3.26900                   | 0.99890                 | 0.00000               | mCG128543.1                                      | Igh-1a LOC382692 LOC628614                       | immunoglobulin heavy chain 1a (serum IgG2a)                                                                                                                                |
| 823783 | 3.23050                   | 0.56160                 | 0.00000               | mCG1036439.2                                     | LOC384413 Igk-V28                                | immunoglobulin kappa chain variable 28 (V28)                                                                                                                               |
| 899105 | 3.22980                   | 0.41100                 | 0.00000               | mCG142070                                        | LOC637785                                        | null                                                                                                                                                                       |
| 739642 | 3.18500                   | 0.52560                 | 0.00000               | mCG141793.1                                      | LOC434026                                        | null                                                                                                                                                                       |
| 898268 | 3.16270                   | 0.52810                 | 0.00000               | mCG127559.1 mCG114359                            | LOC640614 LOC632997 LOC636453                    | null                                                                                                                                                                       |
| 317586 | 3.15470                   | 0.98640                 | 0.00010               | mCG1025125.1                                     | LOC631518                                        | null                                                                                                                                                                       |
| 576556 | 3.14730                   | 1.11630                 | 0.00000               | mCG140401                                        | LOC634430                                        | null                                                                                                                                                                       |
| 902557 | 3.11220                   | 0.71020                 | 0.00000               | mCG127559.1                                      | null                                             | null                                                                                                                                                                       |
| 843602 | 3.08470                   | 0.78140                 | 0.00000               | mCG118954                                        | LOC638634                                        | null                                                                                                                                                                       |
| 897561 | 3.08440                   | 0.54880                 | 0.00000               | null                                             | LOC434609                                        | null                                                                                                                                                                       |
| 483305 | 3.08070                   | 0.65440                 | 0.00000               | null                                             | Gm1419                                           | gene model 1419, (NCBI)                                                                                                                                                    |
| 901720 | 3.07910                   | 0.51480                 | 0.00000               | mCG1026782.1                                     | LOC382695 LOC629938 LOC638485                    | null                                                                                                                                                                       |
| 523804 | 3.01550                   | 0.22180                 | 0.00000               | mCG1037963.1                                     | LOC632180 LOC432993 LOC620169                    | null                                                                                                                                                                       |
| 875823 | 2.97880                   | 0.64400                 | 0.00000               | mCG129378                                        | LOC544903                                        | null                                                                                                                                                                       |
| 410888 | 2.95830                   | 0.97940                 | 0.00000               | mCG1025140.1                                     | LOC633734                                        | null                                                                                                                                                                       |
| 672387 | 2.94750                   | 1.17050                 | 0.00000               | mCG114360 mCG1025864.1                           | null                                             | null                                                                                                                                                                       |
| 401803 | 2.93560                   | 0.50790                 | 0.00000               | mCG118868.1                                      | LOC634298                                        | null                                                                                                                                                                       |
| 615665 | 2.92850                   | 0.88010                 | 0.00000               | mCG1050179                                       | D6Mit97 Igk-V28                                  | DNA segment, Chr 6, Massachusetts Institute of Technology 97 immunoglobulin kappa chain variable 28 (V28)                                                                  |
| 579252 | 2.92670                   | 0.63600                 | 0.00000               | mCG127631.1                                      | Igh-4                                            | immunoglobulin heavy chain 4 (serum IgG1)                                                                                                                                  |
| 832392 | 2.90250                   | 0.86180                 | 0.00000               | null                                             | LOC628127                                        | null                                                                                                                                                                       |
| 894906 | 2.89830                   | 0.71310                 | 0.00000               | mCG118865.1 mCG114299.1                          | LOC629884 LOC637000 Igh Igh-VJ558                | immunoglobulin heavy chain complex immunoglobulin heavy chain (J558 family)                                                                                                |
| 899101 | 2.79970                   | 1.08000                 | 0.00000               | mCG129262.1                                      | Igh-VJ558                                        | immunoglobulin heavy chain (J558 family)                                                                                                                                   |
| 893766 | 2.79370                   | 0.47810                 | 0.00000               | mCG116911.1 mCG142745 mCG142069                  | LOC619833 LOC382696 LOC637398 LOC637794 VH18     | immunoglobulin heavy chain (J558 family)                                                                                                                                   |
| 894845 | 2.79170                   | 0.66090                 | 0.00000               | mCG1036509.2 mCG141633.1 mCG141637.1             | LOC628516 LOC636646 LOC636598 LOC628498          | null                                                                                                                                                                       |
| 621943 | 2.75070                   | 0.43730                 | 0.00000               | mCG127630.1                                      | LOC633062                                        | null                                                                                                                                                                       |
| 797351 | 2.73710                   | 0.26570                 | 0.00000               | mCG118871.1 mCG114299.1 mCG140407                | Igh-1a LOC634338 LOC629884 LOC629871 LOC634222   | immunoglobulin heavy chain 1a (serum IgG2a) immunoglobulin heavy chain complex immunoglobulin heavy chain (J558 family)                                                    |
| 721976 | 2.72350                   | 0.78620                 | 0.00000               | mCG141796.1                                      | LOC545847                                        | null                                                                                                                                                                       |
| 892758 | 2.68780                   | 0.73590                 | 0.00000               | mCG118870.1                                      | LOC634541                                        | null                                                                                                                                                                       |
| 685068 | 2.68190                   | 0.96900                 | 0.00000               | mCG131876.2                                      | null                                             | null                                                                                                                                                                       |
| 902558 | 2.67750                   | 0.53460                 | 0.00000               | mCG124907.1                                      | null                                             | null                                                                                                                                                                       |
| 374491 | 2.67550                   | 0.61830                 | 0.00000               | mCG1036507.2                                     | null                                             | null                                                                                                                                                                       |
| 902338 | 2.66330                   | 0.51890                 | 0.00000               | mCG129972.1                                      | LOC638099 LOC629893                              | null                                                                                                                                                                       |
| 400498 | 2.62390                   | 0.75150                 | 0.00000               | mCG141610.1                                      | null                                             | null                                                                                                                                                                       |
| 892044 | 2.60960                   | 0.42700                 | 0.00000               | mCG1025954.1                                     | null                                             | null                                                                                                                                                                       |
| 902277 | 2.60290                   | 0.68610                 | 0.00000               | mCG113668                                        | LOC633719                                        | null                                                                                                                                                                       |
| 856087 | 2.58540                   | 0.67150                 | 0.00000               | mCG1036442.2                                     | null                                             | null                                                                                                                                                                       |
| 566733 | 2.57470                   | 0.93750                 | 0.00000               | mCG1026777                                       | LOC639369                                        | null                                                                                                                                                                       |
| 478281 | 2.56490                   | 0.98540                 | 0.00010               | null                                             | LOC243431                                        | null                                                                                                                                                                       |
| 657549 | 2.55990                   | 0.50810                 | 0.00000               | mCG1036441.2                                     | LOC620357 LOC637227                              | null                                                                                                                                                                       |
| 896839 | 2.54630                   | 0.47530                 | 0.00000               | mCG118864.1                                      | LOC634081 LOC634275                              | null                                                                                                                                                                       |
| 497944 | 2.52610                   | 1.03850                 | 0.00000               | null                                             | LOC238418                                        | null                                                                                                                                                                       |
| 395082 | 2.49490                   | 0.24860                 | 0.00000               | mCG13668.2                                       | LOC238447 LOC544903 LOC544907 Igh-VJ558          | immunoglobulin heavy chain (J558 family)                                                                                                                                   |
| 411078 | 2.49050                   | 0.82620                 | 0.00000               | mCG1036502.2 mCG132001.2                         | LOC434025 LOC243433 LOC628159 LOC635885          | null                                                                                                                                                                       |
| 903525 | 2.42830                   | 0.89490                 | 0.00000               | mCG1036509.2                                     | LOC628516 LOC636646                              | null                                                                                                                                                                       |
| 892300 | 2.42540                   | 1.12620                 | 0.00000               | mCG1032189.1                                     | LOC629883                                        | null                                                                                                                                                                       |
| 650375 | 2.40130                   | 0.90540                 | 0.00000               | mCG142578                                        | LOC213570 LOC636126                              | null                                                                                                                                                                       |
| 379964 | 2.39580                   | 0.52100                 | 0.00000               | mCG1025534.1                                     | LOC631129                                        | null                                                                                                                                                                       |
| 658871 | 2.37950                   | 0.82770                 | 0.00000               | mCG1036438.2 mCG141622.1                         | Gm1530 Gm1420                                    | gene model 1530, (NCBI) gene model 1420, (NCBI)                                                                                                                            |
| 788195 | 2.35930                   | 0.54530                 | 0.00000               | mCG141636.1                                      | LOC545848                                        | null                                                                                                                                                                       |
| 904211 | 2.35030                   | 1.20470                 | 0.00000               | mCG142561                                        | LOC629906 LOC629908 LOC634791                    | null                                                                                                                                                                       |
| 904213 | 2.34960                   | 0.92070                 | 0.00000               | mCG118867                                        | LOC634123                                        | null                                                                                                                                                                       |
| 316223 | 2.32080                   | 0.25740                 | 0.00000               | mCG1036431.2                                     | ci12                                             | null                                                                                                                                                                       |
| 658873 | 2.32030                   | 0.95390                 | 0.00000               | mCG126268.2 mCG1036508.2 mCG141637.1 mCG114299.1 | Gm1419 Igk-C Gm459 LOC546244 LOC619635           | gene model 1419, (NCBI) immunoglobulin kappa chain, constant region gene model 459, (NCBI)                                                                                 |
| 380936 | 2.28220                   | 0.78480                 | 0.00000               | mCG1036436.1                                     | Gm1418                                           | gene model 1418, (NCBI)                                                                                                                                                    |
| 823261 | 2.28190                   | 0.88690                 | 0.00000               | mCG126265.2 mCG141634.1                          | Gm1419 Gm1524 LOC546244                          | gene model 1419, (NCBI) gene model 1524, (NCBI)                                                                                                                            |
| 900977 | 2.26030                   | 0.91220                 | 0.00000               | mCG141630.1                                      | LOC434586                                        | null                                                                                                                                                                       |
| 894197 | 2.24640                   | 0.93230                 | 0.00000               | mCG116912.1                                      | null                                             | null                                                                                                                                                                       |
| 557237 | 2.21780                   | 0.33990                 | 0.00000               | mCG146830                                        | LOC634450 LOC625794 LOC624610                    | null                                                                                                                                                                       |
| 904212 | 2.19090                   | 0.91540                 | 0.00000               | mCG118865.1                                      | LOC629906 LOC634065 LOC245266                    | null                                                                                                                                                                       |
| 372826 | 2.08430                   | 0.75830                 | 0.00000               | mCG141629.1                                      | null                                             | null                                                                                                                                                                       |
| 910033 | 1.85080                   | 0.21260                 | 0.00000               | mCG131871.2                                      | Igk-V8 LOC545854 Igk-C LOC243469 Igk-V21 Igk-V28 | immunoglobulin kappa chain variable 8 (V8) immunoglobulin kappa chain, constant region immunoglobulin kappa chain variable 21 (V21) immunoglobulin kappa chain variable 2: |
| 388152 | 1.84420                   | 0.96390                 | 0.00000               | null                                             | LOC628571                                        | null                                                                                                                                                                       |
| 305669 | 1.83780                   | 0.57610                 | 0.00000               | mCG142176.1                                      | Igk-V8 LOC637207                                 | immunoglobulin kappa chain variable 8 (V8)                                                                                                                                 |

Supplemental Table 3

|                                                          |                           |                         |                       |                                       |                                             |                                                                                                           |
|----------------------------------------------------------|---------------------------|-------------------------|-----------------------|---------------------------------------|---------------------------------------------|-----------------------------------------------------------------------------------------------------------|
| 456277                                                   | 1.78790                   | 0.37940                 | 0.00000               | mCG8631.2                             | Fcgr3a                                      | Fc fragment of IgG, low affinity IIIa, receptor                                                           |
| 409578                                                   | 1.76210                   | 0.53860                 | 0.00000               | mCG142168.1 mCG142181.1               | LOC620191 LOC637126                         | null                                                                                                      |
| 815506                                                   | 1.75880                   | 0.68830                 | 0.00020               | mCG142169.1                           | LOC637295 LOC620451                         | null                                                                                                      |
| 895899                                                   | 1.75600                   | 0.75600                 | 0.00050               | mCG127250                             | LOC638631                                   | null                                                                                                      |
| 902343                                                   | 1.60140                   | 0.51470                 | 0.00000               | mCG116911.1                           | LOC619833 LOC635935 Igh-VJ558               | immunoglobulin heavy chain (J558 family)                                                                  |
| 897263                                                   | 1.48890                   | 0.24630                 | 0.00000               | mCG142552                             | null                                        | null                                                                                                      |
| 910246                                                   | 1.44630                   | 0.59210                 | 0.00000               | mCG142161.1 mCG1036517.2              | Igk-V21                                     | immunoglobulin kappa chain variable 21 (V21)                                                              |
| 912624                                                   | 1.37490                   | 0.62600                 | 0.00000               | mCG141777                             | LOC433053 LOC623736 Igl-V1                  | immunoglobulin lambda chain, variable 1                                                                   |
| 909884                                                   | 1.36870                   | 0.41510                 | 0.00000               | mCG141776 mCG141779                   | Igl-V1 2010309G21Rik                        | immunoglobulin lambda chain, variable 1 RIKEN cDNA 2010309G21 gene                                        |
| 649745                                                   | 0.92060                   | 0.38690                 | 0.00100               | mCG8629.2                             | Fcgr3                                       | Fc receptor, IgG, low affinity III                                                                        |
| 774411                                                   | 0.86170                   | 0.23540                 | 0.00000               | mCG144561                             | Alox5ap                                     | arachidonate 5-lipoxygenase activating protein                                                            |
| 465504                                                   | 0.81420                   | 0.31440                 | 0.00020               | mCG8632.2                             | Fcer1g                                      | Fc receptor, IgE, high affinity I, gamma polypeptide                                                      |
| 323019                                                   | 0.65580                   | 0.08400                 | 0.00000               | mCG132542.2                           | Clec2h                                      | C-type lectin domain family 2, member h                                                                   |
| <b>Cytokine and chemokine mediated signaling pathway</b> |                           |                         |                       |                                       |                                             |                                                                                                           |
| PROBE                                                    | LOG_Q[090514_J-K_ind.ma2] | VAR[090514_J-K_ind.ma2] | P[090514_J-K_ind.ma2] | Celera Gene ID                        | Gene_Symbol                                 | Gene_Name                                                                                                 |
| 575878                                                   | 4.39140                   | 0.41670                 | 0.00000               | mCG12528.2                            | Cxcl9                                       | chemokine (C-X-C motif) ligand 9                                                                          |
| 930152                                                   | 3.26280                   | 0.49470                 | 0.00000               | mCG12531.2                            | Cxcl10                                      | chemokine (C-X-C motif) ligand 10                                                                         |
| 624929                                                   | 2.74780                   | 0.48220                 | 0.00000               | mCG2202.1                             | Cxcr3                                       | chemokine (C-X-C motif) receptor 3                                                                        |
| 801088                                                   | 2.46720                   | 0.63340                 | 0.00000               | mCG15845.2                            | Cxcr6                                       | chemokine (C-X-C motif) receptor 6                                                                        |
| 516139                                                   | 2.40280                   | 0.34790                 | 0.00000               | mCG11684.1                            | Ccl5                                        | chemokine (C-C motif) ligand 5                                                                            |
| 907844                                                   | 1.54020                   | 0.56760                 | 0.00000               | mCG8184.2                             | Ccl2                                        | chemokine (C-C motif) ligand 2                                                                            |
| 928327                                                   | 1.26980                   | 0.21370                 | 0.00000               | mCG11623.1                            | Ccl6                                        | chemokine (C-C motif) ligand 6                                                                            |
| 753313                                                   | 1.10330                   | 0.55180                 | 0.00000               | mCG123600 mCG114938                   | Ccl8                                        | chemokine (C-C motif) ligand 8                                                                            |
| 665530                                                   | 0.55120                   | 0.08910                 | 0.00060               | mCG20697.2                            | Csf2ra                                      | colony stimulating factor 2 receptor, alpha, low-affinity (granulocyte-macrophage)                        |
| <b>Cytokine/chemokine mediated immunity</b>              |                           |                         |                       |                                       |                                             |                                                                                                           |
| PROBE                                                    | LOG_Q[090514_J-K_ind.ma2] | VAR[090514_J-K_ind.ma2] | P[090514_J-K_ind.ma2] | Celera Gene ID                        | Gene_Symbol                                 | Gene_Name                                                                                                 |
| 575878                                                   | 4.39140                   | 0.41670                 | 0.00000               | mCG12528.2                            | Cxcl9                                       | chemokine (C-X-C motif) ligand 9                                                                          |
| 930152                                                   | 3.26280                   | 0.49470                 | 0.00000               | mCG12531.2                            | Cxcl10                                      | chemokine (C-X-C motif) ligand 10                                                                         |
| 624929                                                   | 2.74780                   | 0.48220                 | 0.00000               | mCG2202.1                             | Cxcr3                                       | chemokine (C-X-C motif) receptor 3                                                                        |
| 801088                                                   | 2.46720                   | 0.63340                 | 0.00000               | mCG15845.2                            | Cxcr6                                       | chemokine (C-X-C motif) receptor 6                                                                        |
| 516139                                                   | 2.40280                   | 0.34790                 | 0.00000               | mCG11684.1                            | Ccl5                                        | chemokine (C-C motif) ligand 5                                                                            |
| 907844                                                   | 1.54020                   | 0.56760                 | 0.00000               | mCG8184.2                             | Ccl2                                        | chemokine (C-C motif) ligand 2                                                                            |
| 928327                                                   | 1.26980                   | 0.21370                 | 0.00000               | mCG11623.1                            | Ccl6                                        | chemokine (C-C motif) ligand 6                                                                            |
| 753313                                                   | 1.10330                   | 0.55180                 | 0.00000               | mCG123600 mCG114938                   | Ccl8                                        | chemokine (C-C motif) ligand 8                                                                            |
| <b>Immunity and defense</b>                              |                           |                         |                       |                                       |                                             |                                                                                                           |
| PROBE                                                    | LOG_Q[090514_J-K_ind.ma2] | VAR[090514_J-K_ind.ma2] | P[090514_J-K_ind.ma2] | Celera Gene ID                        | Gene_Symbol                                 | Gene_Name                                                                                                 |
| 429239                                                   | 5.93180                   | 0.93180                 | 0.00000               | mCG56372.2                            | LOC432699                                   | null                                                                                                      |
| 550292                                                   | 5.23590                   | 1.24620                 | 0.00000               | mCG4516.2                             | Gzma                                        | granzyme A                                                                                                |
| 575878                                                   | 4.39140                   | 0.41670                 | 0.00000               | mCG12528.2                            | Cxcl9                                       | chemokine (C-X-C motif) ligand 9                                                                          |
| 339582                                                   | 4.26380                   | 0.89670                 | 0.00000               | mCG140410                             | Igh-1a LOC544908                            | immunoglobulin heavy chain 1a (serum IgG2a)                                                               |
| 590082                                                   | 4.13340                   | 0.85190                 | 0.00000               | mCG141789.1                           | Igk-V32                                     | immunoglobulin kappa chain variable 32 (V32)                                                              |
| 808065                                                   | 3.99290                   | 1.80190                 | 0.00000               | mCG130744.2 mCG1036427.2              | LOC635601 bd2 LOC628027                     | null                                                                                                      |
| 736226                                                   | 3.97930                   | 1.02240                 | 0.00000               | mCG1027522.1 mCG1029835.1             | LOC636462                                   | null                                                                                                      |
| 401576                                                   | 3.90870                   | 1.76620                 | 0.00000               | mCG132002.2                           | LOC243439                                   | null                                                                                                      |
| 891891                                                   | 3.85240                   | 1.34100                 | 0.00000               | mCG113660.1                           | LOC633515                                   | null                                                                                                      |
| 538665                                                   | 3.83340                   | 0.58660                 | 0.00000               | null                                  | LOC434031 Igk-V38                           | immunoglobulin kappa chain variable 38 (V38)                                                              |
| 491036                                                   | 3.77740                   | 0.84550                 | 0.00000               | mCG116913.1                           | LOC636067                                   | null                                                                                                      |
| 699266                                                   | 3.77400                   | 0.76790                 | 0.00000               | mCG1025451.1                          | null                                        | null                                                                                                      |
| 742698                                                   | 3.74840                   | 0.88410                 | 0.00000               | mCG130744.2 mCG1036427.2 mCG1036498.2 | LOC635664 LOC635601 bd2 LOC628056 LOC628027 | null                                                                                                      |
| 493584                                                   | 3.71590                   | 0.98470                 | 0.00000               | mCG142153.1                           | LOC620105 LOC637047                         | null                                                                                                      |
| 411187                                                   | 3.70140                   | 0.56530                 | 0.00000               | null                                  | LOC620017                                   | null                                                                                                      |
| 348117                                                   | 3.67230                   | 0.45770                 | 0.00000               | mCG1036432.2                          | null                                        | null                                                                                                      |
| 857940                                                   | 3.65340                   | 1.28650                 | 0.00000               | mCG1037662.1                          | LOC630251                                   | null                                                                                                      |
| 715331                                                   | 3.64830                   | 0.51560                 | 0.00000               | mCG141621.1                           | LOC434037                                   | null                                                                                                      |
| 901486                                                   | 3.64130                   | 1.45140                 | 0.00000               | mCG68149.2                            | LOC630331 LOC633472                         | null                                                                                                      |
| 596021                                                   | 3.63320                   | 1.11870                 | 0.00000               | mCG146921.1 mCG141794.1 mCG141802.1   | IgM                                         | null                                                                                                      |
| 574582                                                   | 3.58730                   | 1.10810                 | 0.00000               | mCG146921.1 mCG141794.1               | IgM                                         | null                                                                                                      |
| 515370                                                   | 3.58010                   | 1.03810                 | 0.00000               | mCG142162.1                           | LOC626145 LOC545854                         | null                                                                                                      |
| 444829                                                   | 3.55200                   | 1.23660                 | 0.00000               | mCG141790.1                           | Gm1067                                      | gene model 1067, (NCBI)                                                                                   |
| 489583                                                   | 3.43750                   | 0.72290                 | 0.00000               | mCG114300.1                           | null                                        | null                                                                                                      |
| 479671                                                   | 3.42090                   | 0.74830                 | 0.00000               | mCG126269.2 mCG1036505.2              | gn33 Igk-V34 Igk-V33                        | immunoglobulin kappa chain variable 34 (V34) immunoglobulin kappa chain variable 33 (V33)                 |
| 896758                                                   | 3.41680                   | 0.08000                 | 0.00000               | mCG1037964.1                          | LOC620216 LOC632220                         | null                                                                                                      |
| 583890                                                   | 3.36590                   | 0.47530                 | 0.00000               | mCG117763.1                           | LOC634652 LOC382695 LOC436124               | null                                                                                                      |
| 919480                                                   | 3.30590                   | 0.97960                 | 0.00000               | mCG141784.1                           | LOC434025                                   | null                                                                                                      |
| 675426                                                   | 3.26900                   | 0.99890                 | 0.00000               | mCG128543.1                           | Igh-1a LOC382692 LOC628614                  | immunoglobulin heavy chain 1a (serum IgG2a)                                                               |
| 930152                                                   | 3.26280                   | 0.49470                 | 0.00000               | mCG12531.2                            | Cxcl10                                      | chemokine (C-X-C motif) ligand 10                                                                         |
| 823783                                                   | 3.23050                   | 0.56160                 | 0.00000               | mCG1036439.2                          | LOC384413 Igk-V28                           | immunoglobulin kappa chain variable 28 (V28)                                                              |
| 899105                                                   | 3.22980                   | 0.41100                 | 0.00000               | mCG142070                             | LOC637785                                   | null                                                                                                      |
| 739642                                                   | 3.18500                   | 0.52560                 | 0.00000               | mCG141793.1                           | LOC434026                                   | null                                                                                                      |
| 898268                                                   | 3.16270                   | 0.52810                 | 0.00000               | mCG127559.1 mCG114359                 | LOC640614 LOC632997 LOC636453               | null                                                                                                      |
| 317586                                                   | 3.15470                   | 0.98640                 | 0.00010               | mCG1025125.1                          | LOC631518                                   | null                                                                                                      |
| 576556                                                   | 3.14730                   | 1.11630                 | 0.00000               | mCG140401                             | LOC634430                                   | null                                                                                                      |
| 902557                                                   | 3.11220                   | 0.71020                 | 0.00000               | mCG127559.1                           | null                                        | null                                                                                                      |
| 843602                                                   | 3.08470                   | 0.78140                 | 0.00000               | mCG118954                             | LOC638634                                   | null                                                                                                      |
| 897561                                                   | 3.08440                   | 0.54880                 | 0.00000               | null                                  | LOC434609                                   | null                                                                                                      |
| 483305                                                   | 3.08070                   | 0.65440                 | 0.00000               | null                                  | Gm1419                                      | gene model 1419, (NCBI)                                                                                   |
| 901720                                                   | 3.07910                   | 0.51480                 | 0.00000               | mCG1026782.1                          | LOC382695 LOC629938 LOC638485               | null                                                                                                      |
| 523804                                                   | 3.01550                   | 0.22180                 | 0.00000               | mCG1037963.1                          | LOC632180 LOC432993 LOC620169               | null                                                                                                      |
| 875823                                                   | 2.97880                   | 0.64400                 | 0.00000               | mCG129378                             | LOC544903                                   | null                                                                                                      |
| 410888                                                   | 2.95830                   | 0.97940                 | 0.00000               | mCG1025140.1                          | LOC633734                                   | null                                                                                                      |
| 672387                                                   | 2.94750                   | 1.17050                 | 0.00000               | mCG114360 mCG1025864.1                | null                                        | null                                                                                                      |
| 401803                                                   | 2.93560                   | 0.50790                 | 0.00000               | mCG118868.1                           | LOC634298                                   | null                                                                                                      |
| 615665                                                   | 2.92850                   | 0.88010                 | 0.00000               | mCG1050179                            | D6Mit97 Igk-V28                             | DNA segment, Chr 6, Massachusetts Institute of Technology 97 immunoglobulin kappa chain variable 28 (V28) |
| 579252                                                   | 2.92670                   | 0.63600                 | 0.00000               | mCG127631.1                           | Igh-4                                       | immunoglobulin heavy chain 4 (serum IgG1)                                                                 |
| 832392                                                   | 2.90250                   | 0.86180                 | 0.00000               | null                                  | LOC628127                                   | null                                                                                                      |
| 894906                                                   | 2.89830                   | 0.71310                 | 0.00000               | mCG118865.1 mCG114299.1               | LOC629884 LOC637000 Igh-VJ558               | immunoglobulin heavy chain complex immunoglobulin heavy chain (J558 family)                               |
| 884118                                                   | 2.80080                   | 1.03780                 | 0.00040               | mCG130827                             | Gzmb                                        | granzyme B                                                                                                |

Supplemental Table 3

|        |         |         |         |                                                  |                                                  |                                                                                                                                                                           |
|--------|---------|---------|---------|--------------------------------------------------|--------------------------------------------------|---------------------------------------------------------------------------------------------------------------------------------------------------------------------------|
| 899101 | 2.79970 | 1.08000 | 0.00000 | mCG129262.1                                      | Igh-VJ558                                        | immunoglobulin heavy chain (J558 family)                                                                                                                                  |
| 893766 | 2.79370 | 0.47810 | 0.00000 | mCG116911.1 mCG142745 mCG142069                  | LOC619833 LOC382696 LOC637398 LOC637794 VH18     | immunoglobulin heavy chain (J558 family)                                                                                                                                  |
| 894845 | 2.79170 | 0.66090 | 0.00000 | mCG1036509.2 mCG141633.1 mCG141637.1             | LOC628516 LOC636646 LOC636598 LOC628498          | null                                                                                                                                                                      |
| 621943 | 2.75070 | 0.43730 | 0.00000 | mCG127630.1                                      | LOC633062                                        | null                                                                                                                                                                      |
| 624929 | 2.74780 | 0.48220 | 0.00000 | mCG2202.1                                        | Cxcr3                                            | chemokine (C-X-C motif) receptor 3                                                                                                                                        |
| 797351 | 2.73710 | 0.26570 | 0.00000 | mCG118871.1 mCG114299.1 mCG140407                | Igh-1a LOC634338 LOC629884 LOC629871 LOC634222   | immunoglobulin heavy chain 1a (serum IgG2a) immunoglobulin heavy chain complex immunoglobulin heavy chain (J558 family)                                                   |
| 721976 | 2.72350 | 0.78620 | 0.00000 | mCG141796.1                                      | LOC545847                                        | null                                                                                                                                                                      |
| 892758 | 2.68780 | 0.73590 | 0.00000 | mCG118870.1                                      | LOC634541                                        | null                                                                                                                                                                      |
| 685068 | 2.68190 | 0.96900 | 0.00000 | mCG131876.2                                      | null                                             | null                                                                                                                                                                      |
| 902558 | 2.67750 | 0.53460 | 0.00000 | mCG124907.1                                      | null                                             | null                                                                                                                                                                      |
| 374491 | 2.67550 | 0.61830 | 0.00000 | mCG1036507.2                                     | null                                             | null                                                                                                                                                                      |
| 902338 | 2.66330 | 0.51890 | 0.00000 | mCG129972.1                                      | LOC638099 LOC629893                              | null                                                                                                                                                                      |
| 712519 | 2.65430 | 0.25200 | 0.00000 | null                                             | H2-Q8                                            | histocompatibility 2, Q region locus 8                                                                                                                                    |
| 400498 | 2.62390 | 0.75150 | 0.00000 | mCG141610.1                                      | null                                             | null                                                                                                                                                                      |
| 586296 | 2.61800 | 0.56980 | 0.00010 | mCG146987                                        | Gbp1                                             | guanylate nucleotide binding protein 1                                                                                                                                    |
| 892044 | 2.60960 | 0.42700 | 0.00000 | mCG1025954.1                                     | null                                             | null                                                                                                                                                                      |
| 902277 | 2.60290 | 0.68610 | 0.00000 | mCG113668                                        | LOC633719                                        | null                                                                                                                                                                      |
| 320903 | 2.58600 | 0.32230 | 0.00000 | null                                             | H2-Q1                                            | histocompatibility 2, Q region locus 1                                                                                                                                    |
| 856087 | 2.58540 | 0.67150 | 0.00000 | mCG1036442.2                                     | null                                             | null                                                                                                                                                                      |
| 566733 | 2.57470 | 0.93750 | 0.00000 | mCG1026777                                       | LOC639369                                        | null                                                                                                                                                                      |
| 478281 | 2.56490 | 0.98540 | 0.00010 | null                                             | LOC243431                                        | null                                                                                                                                                                      |
| 431279 | 2.56150 | 0.38030 | 0.00000 | mCG113208.1                                      | H2-Ea H2-Aa                                      | histocompatibility 2, class II antigen E alpha histocompatibility 2, class II antigen A, alpha                                                                            |
| 657549 | 2.55990 | 0.50810 | 0.00000 | mCG1036441.2                                     | LOC620357 LOC637227                              | null                                                                                                                                                                      |
| 896839 | 2.54630 | 0.47530 | 0.00000 | mCG118864.1                                      | LOC634081 LOC634275                              | null                                                                                                                                                                      |
| 745275 | 2.54470 | 0.18670 | 0.00000 | mCG23016.2                                       | H2-DMa                                           | histocompatibility 2, class II, locus DMa                                                                                                                                 |
| 497944 | 2.52610 | 1.03850 | 0.00000 | null                                             | LOC238418                                        | null                                                                                                                                                                      |
| 395082 | 2.49490 | 0.24860 | 0.00000 | mCG13668.2                                       | LOC238447 LOC544903 LOC544907 Igh-VJ558          | immunoglobulin heavy chain (J558 family)                                                                                                                                  |
| 411078 | 2.49050 | 0.82620 | 0.00000 | mCG1036502.2 mCG132001.2                         | LOC434025 LOC243433 LOC628159 LOC635885          | null                                                                                                                                                                      |
| 801088 | 2.46720 | 0.63340 | 0.00000 | mCG15845.2                                       | Cxcr6                                            | chemokine (C-X-C motif) receptor 6                                                                                                                                        |
| 903525 | 2.42830 | 0.89490 | 0.00000 | mCG1036509.2                                     | LOC628516 LOC636646                              | null                                                                                                                                                                      |
| 892300 | 2.42540 | 1.12620 | 0.00000 | mCG1032189.1                                     | LOC629883                                        | null                                                                                                                                                                      |
| 516139 | 2.40280 | 0.34790 | 0.00000 | mCG11684.1                                       | Ccl5                                             | chemokine (C-C motif) ligand 5                                                                                                                                            |
| 650375 | 2.40130 | 0.90540 | 0.00000 | mCG142578                                        | LOC213570 LOC636126                              | null                                                                                                                                                                      |
| 379964 | 2.39580 | 0.52100 | 0.00000 | mCG1025534.1                                     | LOC631129                                        | null                                                                                                                                                                      |
| 658871 | 2.37950 | 0.82770 | 0.00000 | mCG1036438.2 mCG141622.1                         | Gm1530 Gm1420                                    | gene model 1530, (NCBI) gene model 1420, (NCBI)                                                                                                                           |
| 847876 | 2.37220 | 0.26840 | 0.00000 | mCG122229                                        | Gbp2                                             | guanylate nucleotide binding protein 2                                                                                                                                    |
| 788195 | 2.35930 | 0.54530 | 0.00000 | mCG141636.1                                      | LOC545848                                        | null                                                                                                                                                                      |
| 904211 | 2.35030 | 1.20470 | 0.00000 | mCG142561                                        | LOC629906 LOC629908 LOC634791                    | null                                                                                                                                                                      |
| 904213 | 2.34960 | 0.92070 | 0.00000 | mCG118867                                        | LOC634123                                        | null                                                                                                                                                                      |
| 316223 | 2.32080 | 0.25740 | 0.00000 | mCG1036431.2                                     | ci12                                             | null                                                                                                                                                                      |
| 658873 | 2.32030 | 0.95390 | 0.00000 | mCG126268.2 mCG1036508.2 mCG141637.1 mCG141637.1 | Gm1419 Igh-C Gm459 LOC546244 LOC619635           | gene model 1419, (NCBI) immunoglobulin kappa chain, constant region gene model 459, (NCBI)                                                                                |
| 380936 | 2.28220 | 0.78480 | 0.00000 | mCG1036436.1                                     | Gm1418                                           | gene model 1418, (NCBI)                                                                                                                                                   |
| 823261 | 2.28190 | 0.88690 | 0.00000 | mCG126265.2 mCG141634.1                          | Gm1419 Gm1524 LOC546244                          | gene model 1419, (NCBI) gene model 1524, (NCBI)                                                                                                                           |
| 637912 | 2.27350 | 0.18870 | 0.00000 | mCG132704.1                                      | H2-Ab1 LOC641240                                 | histocompatibility 2, class II antigen A, beta 1                                                                                                                          |
| 900977 | 2.26030 | 0.91220 | 0.00000 | mCG141630.1                                      | LOC434586                                        | null                                                                                                                                                                      |
| 904963 | 2.25850 | 0.40890 | 0.00000 | mCG132703.2 mCG132689.1                          | H2-DMb2 H2-DMb1                                  | histocompatibility 2, class II, locus Mb2 histocompatibility 2, class II, locus Mb1                                                                                       |
| 775978 | 2.24760 | 0.20400 | 0.00000 | mCG6027.2                                        | Cd74                                             | CD74 antigen (invariant polypeptide of major histocompatibility complex, class II antigen-associated)                                                                     |
| 894197 | 2.24640 | 0.93230 | 0.00000 | mCG116912.1                                      | null                                             | null                                                                                                                                                                      |
| 920968 | 2.22910 | 0.24630 | 0.00000 | mCG9940.2                                        | H2-Eb1                                           | histocompatibility 2, class II antigen E beta                                                                                                                             |
| 557237 | 2.21780 | 0.33990 | 0.00000 | mCG146830                                        | LOC634450 LOC625794 LOC624610                    | null                                                                                                                                                                      |
| 904212 | 2.19090 | 0.91540 | 0.00000 | mCG118865.1                                      | LOC629906 LOC634065 LOC245266                    | null                                                                                                                                                                      |
| 643417 | 2.17360 | 0.64740 | 0.00000 | mCG124141                                        | null                                             | null                                                                                                                                                                      |
| 372826 | 2.08430 | 0.75830 | 0.00000 | mCG141629.1                                      | null                                             | null                                                                                                                                                                      |
| 522474 | 2.05370 | 0.62000 | 0.00000 | mCG126563.1                                      | C2ta                                             | class II transactivator                                                                                                                                                   |
| 873670 | 2.02300 | 0.22280 | 0.00000 | mCG23012.2                                       | Tap1                                             | transporter 1, ATP-binding cassette, sub-family B (MDR/TAP)                                                                                                               |
| 780747 | 1.99790 | 0.49670 | 0.00010 | mCG127285.2                                      | LOC636147 Cd8a                                   | CD8 antigen, alpha chain                                                                                                                                                  |
| 742215 | 1.96190 | 0.23130 | 0.00000 | mCG8696.2                                        | Tcra LOC545051 A430107P09Rik                     | T-cell receptor alpha chain RIKEN cDNA A430107P09 gene                                                                                                                    |
| 447264 | 1.95530 | 0.48700 | 0.00030 | mCG11758.2                                       | Ctsw                                             | cathepsin W                                                                                                                                                               |
| 910033 | 1.85080 | 0.21260 | 0.00000 | mCG131871.2                                      | Igk-V8 LOC545854 Igh-C LOC243469 Igh-V21 Igh-V28 | immunoglobulin kappa chain variable 8 (V8) immunoglobulin kappa chain, constant region immunoglobulin kappa chain variable 21 (V21) immunoglobulin kappa chain variable 2 |
| 388152 | 1.84420 | 0.96390 | 0.00000 | null                                             | LOC628571                                        | null                                                                                                                                                                      |
| 305669 | 1.83780 | 0.57610 | 0.00000 | mCG142176.1                                      | Igk-V8 LOC637207                                 | immunoglobulin kappa chain variable 8 (V8)                                                                                                                                |
| 616423 | 1.80620 | 0.42350 | 0.00000 | mCG20328.2                                       | 5830443L24Rik                                    | RIKEN cDNA 5830443L24 gene                                                                                                                                                |
| 456277 | 1.78790 | 0.37940 | 0.00000 | mCG8631.2                                        | Fcgr3a                                           | Fc fragment of IgG, low affinity IIIa, receptor                                                                                                                           |
| 840423 | 1.78240 | 0.29170 | 0.00000 | mCG1551.2                                        | Cd3g                                             | CD3 antigen, gamma polypeptide                                                                                                                                            |
| 405120 | 1.77250 | 0.22730 | 0.00000 | mCG21119.2                                       | Gbp4                                             | guanylate nucleotide binding protein 4                                                                                                                                    |
| 409578 | 1.76210 | 0.53860 | 0.00000 | mCG142168.1 mCG142181.1                          | LOC620191 LOC637126                              | null                                                                                                                                                                      |
| 815506 | 1.75880 | 0.68830 | 0.00020 | mCG142169.1                                      | LOC637295 LOC620451                              | null                                                                                                                                                                      |
| 895899 | 1.75600 | 0.75600 | 0.00050 | mCG127250                                        | LOC638631                                        | null                                                                                                                                                                      |
| 453230 | 1.74770 | 0.32150 | 0.00000 | mCG1536.1                                        | Cd3d                                             | CD3 antigen, delta polypeptide                                                                                                                                            |
| 913926 | 1.72950 | 0.51800 | 0.00000 | mCG141961                                        | 9830147J24Rik                                    | RIKEN cDNA 9830147J24 gene                                                                                                                                                |
| 613784 | 1.67590 | 0.37020 | 0.00000 | mCG17747.2                                       | Zap70                                            | zeta-chain (TCR) associated protein kinase                                                                                                                                |
| 902343 | 1.60140 | 0.51470 | 0.00000 | mCG116911.1                                      | LOC619833 LOC635935 Igh-VJ558                    | immunoglobulin heavy chain (J558 family)                                                                                                                                  |
| 501966 | 1.57600 | 0.44910 | 0.00000 | mCG147911                                        | B2m                                              | beta-2 microglobulin                                                                                                                                                      |
| 907844 | 1.54020 | 0.56760 | 0.00000 | mCG8184.2                                        | Ccl2                                             | chemokine (C-C motif) ligand 2                                                                                                                                            |
| 897263 | 1.48890 | 0.24630 | 0.00000 | mCG142552                                        | null                                             | null                                                                                                                                                                      |
| 910246 | 1.44630 | 0.59210 | 0.00000 | mCG142161.1 mCG1036517.2                         | Igk-V21                                          | immunoglobulin kappa chain variable 21 (V21)                                                                                                                              |
| 917567 | 1.43150 | 0.27250 | 0.00000 | mCG15923.1                                       | Aif1                                             | allograft inflammatory factor 1                                                                                                                                           |
| 912624 | 1.37490 | 0.62600 | 0.00000 | mCG141777                                        | LOC433053 LOC623736 Igl-V1                       | immunoglobulin lambda chain, variable 1                                                                                                                                   |
| 909884 | 1.36870 | 0.41510 | 0.00000 | mCG141776 mCG141779                              | Igl-V1 2010309G21Rik                             | immunoglobulin lambda chain, variable 1 RIKEN cDNA 2010309G21 gene                                                                                                        |
| 909409 | 1.35240 | 0.42110 | 0.00000 | mCG9333.2                                        | C1qb                                             | complement component 1, q subcomponent, beta polypeptide                                                                                                                  |
| 607896 | 1.33990 | 0.28910 | 0.00000 | mCG21470.1                                       | Ifit1                                            | interferon-induced protein with tetratricopeptide repeats 1                                                                                                               |
| 314727 | 1.32380 | 0.32000 | 0.00000 | mCG10007.2                                       | Cd48                                             | CD48 antigen                                                                                                                                                              |
| 351046 | 1.32030 | 0.18470 | 0.00000 | mCG132214.1                                      | Clec4a1                                          | C-type lectin domain family 4, member a1                                                                                                                                  |
| 315737 | 1.30020 | 0.48310 | 0.00000 | mCG3553.3                                        | Selepl                                           | selectin, platelet (p-selectin) ligand                                                                                                                                    |
| 928327 | 1.26980 | 0.21370 | 0.00000 | mCG11623.1                                       | Ccl6                                             | chemokine (C-C motif) ligand 6                                                                                                                                            |
| 454874 | 1.23930 | 0.16550 | 0.00000 | mCG6391.1                                        | Ptpn22                                           | protein tyrosine phosphatase, non-receptor type 22 (lymphoid)                                                                                                             |
| 736887 | 1.21900 | 0.11950 | 0.00000 | mCG22139.1                                       | Nkg7                                             | natural killer cell group 7 sequence                                                                                                                                      |
| 737611 | 1.16720 | 0.29130 | 0.00000 | null                                             | Lck                                              | lymphocyte protein tyrosine kinase                                                                                                                                        |
| 355529 | 1.15290 | 0.20110 | 0.00000 | mCG132215.1                                      | Clec4a3                                          | C-type lectin domain family 4, member a3                                                                                                                                  |
| 753313 | 1.10330 | 0.55180 | 0.00000 | mCG123600 mCG114938                              | Ccl8                                             | chemokine (C-C motif) ligand 8                                                                                                                                            |
| 812906 | 1.08450 | 0.38480 | 0.00000 | mCG144019                                        | Saa2                                             | serum amyloid A 2                                                                                                                                                         |

Supplemental Table 3

|                                              |                           |                         |                       |                         |                            |                                                                                                                                                                |
|----------------------------------------------|---------------------------|-------------------------|-----------------------|-------------------------|----------------------------|----------------------------------------------------------------------------------------------------------------------------------------------------------------|
| 440084                                       | 1.07700                   | 0.18760                 | 0.00000               | mCG9108.1               | Cd274                      | CD274 antigen                                                                                                                                                  |
| 812669                                       | 1.06680                   | 0.25910                 | 0.00010               | mCG3074.1               | Cd1d1                      | CD1d1 antigen                                                                                                                                                  |
| 604623                                       | 1.06550                   | 0.09790                 | 0.00000               | null                    | Parp3                      | poly (ADP-ribose) polymerase family, member 3                                                                                                                  |
| 524163                                       | 1.04600                   | 0.18300                 | 0.00000               | mCG9327.1               | C1qa                       | complement component 1, q subcomponent, alpha polypeptide                                                                                                      |
| 732899                                       | 1.04450                   | 0.23180                 | 0.00000               | mCG141548               | Oasl2                      | 2'-5' oligoadenylate synthetase-like 2                                                                                                                         |
| 374617                                       | 1.04100                   | 0.22850                 | 0.00000               | mCG3049.3               | Lyzs                       | lysozyme                                                                                                                                                       |
| 897539                                       | 1.03280                   | 0.07740                 | 0.00000               | mCG142248.1             | LOC633551[C4]Slp           | complement component 4 (within H-2S) sex-limited protein                                                                                                       |
| 675339                                       | 1.02480                   | 0.35290                 | 0.00000               | mCG9326.1               | C1qg                       | complement component 1, q subcomponent, gamma polypeptide                                                                                                      |
| 925708                                       | 0.98980                   | 0.20940                 | 0.00000               | mCG22590.1              | Ifitm3                     | interferon induced transmembrane protein 3                                                                                                                     |
| 922460                                       | 0.97840                   | 0.09980                 | 0.00000               | mCG13768.1              | Irf1                       | interferon regulatory factor 1                                                                                                                                 |
| 612867                                       | 0.97300                   | 0.41510                 | 0.00060               | mCG128047.2             | Gimap4                     | GTPase, IMAP family member 4                                                                                                                                   |
| 800022                                       | 0.96700                   | 0.18650                 | 0.00000               | mCG22805.2              | Tyrobp                     | TYRO protein tyrosine kinase binding protein                                                                                                                   |
| 908953                                       | 0.94240                   | 0.09150                 | 0.00000               | mCG11606.2              | B2m                        | beta-2 microglobulin                                                                                                                                           |
| 649745                                       | 0.92060                   | 0.38690                 | 0.00100               | mCG8629.2               | Fcgr3                      | Fc receptor, IgG, low affinity III                                                                                                                             |
| 923823                                       | 0.91860                   | 0.24270                 | 0.00000               | mCG1253.1               | Pglyrp1                    | peptidoglycan recognition protein 1                                                                                                                            |
| 692814                                       | 0.90880                   | 0.13390                 | 0.00000               | mCG21986.3              | Samhd1                     | SAM domain and HD domain, 1                                                                                                                                    |
| 638437                                       | 0.88810                   | 0.06670                 | 0.00000               | mCG132391.2             | H2-T9 H2-T17 H2-T22 H2-T10 | histocompatibility 2, T region locus 9 histocompatibility 2, T region locus 17 histocompatibility 2, T region locus 22 histocompatibility 2, T region locus 10 |
| 847591                                       | 0.87240                   | 0.18830                 | 0.00000               | mCG134313.1             | Tapbp1                     | TAP binding protein-like                                                                                                                                       |
| 774411                                       | 0.86170                   | 0.23540                 | 0.00000               | mCG144561               | Alox5ap                    | arachidonate 5-lipoxygenase activating protein                                                                                                                 |
| 454213                                       | 0.85610                   | 0.31890                 | 0.00000               | mCG3047.2               | Lzp-s                      | P lysozyme structural                                                                                                                                          |
| 930739                                       | 0.84530                   | 0.22190                 | 0.00000               | mCG141466               | C1r                        | complement component 1, r subcomponent                                                                                                                         |
| 465504                                       | 0.81420                   | 0.31440                 | 0.00020               | mCG8632.2               | Fcer1g                     | Fc receptor, IgE, high affinity I, gamma polypeptide                                                                                                           |
| 558496                                       | 0.79940                   | 0.13770                 | 0.00000               | mCG12223.1              | H2-T23                     | histocompatibility 2, T region locus 23                                                                                                                        |
| 414909                                       | 0.78410                   | 0.27060                 | 0.00020               | mCG6318.1               | Ifi203                     | interferon activated gene 203                                                                                                                                  |
| 928306                                       | 0.77450                   | 0.10840                 | 0.00000               | mCG23013.2              | Tap2                       | transporter 2, ATP-binding cassette, sub-family B (MDR/TAP)                                                                                                    |
| 766362                                       | 0.74930                   | 0.14560                 | 0.00000               | mCG125800.1             | Fyn                        | Fyn proto-oncogene                                                                                                                                             |
| 334297                                       | 0.71020                   | 0.20460                 | 0.00010               | null                    | Cd99                       | CD99 antigen                                                                                                                                                   |
| 912733                                       | 0.67340                   | 0.08560                 | 0.00000               | mCG129013.1             | Cd47                       | CD47 antigen (Rh-related antigen, integrin-associated signal transducer)                                                                                       |
| 323019                                       | 0.65580                   | 0.08400                 | 0.00000               | mCG132542.2             | Clec2h                     | C-type lectin domain family 2, member h                                                                                                                        |
| 916013                                       | 0.64810                   | 0.18630                 | 0.00040               | mCG11072.3              | Lsp1                       | lymphocyte specific 1                                                                                                                                          |
| 675921                                       | 0.59630                   | 0.06190                 | 0.00000               | mCG120898.1             | LOC633897                  | null                                                                                                                                                           |
| 351041                                       | 0.55290                   | 0.08600                 | 0.00040               | mCG129426.1             | Cd9                        | CD9 antigen                                                                                                                                                    |
| 665530                                       | 0.55120                   | 0.08910                 | 0.00060               | mCG20697.2              | Csf2ra                     | colony stimulating factor 2 receptor, alpha, low-affinity (granulocyte-macrophage)                                                                             |
| <b>Interferon-mediated immunity</b>          |                           |                         |                       |                         |                            |                                                                                                                                                                |
| PROBE                                        | LOG_Q[090514_J-K_ind.ma2] | VAR[090514_J-K_ind.ma2] | P[090514_J-K_ind.ma2] | Celera Gene ID          | Gene_Symbol                | Gene_Name                                                                                                                                                      |
| 575878                                       | 4.39140                   | 0.41670                 | 0.00000               | mCG12528.2              | Cxcl9                      | chemokine (C-X-C motif) ligand 9                                                                                                                               |
| 930152                                       | 3.26280                   | 0.49470                 | 0.00000               | mCG12531.2              | Cxcl10                     | chemokine (C-X-C motif) ligand 10                                                                                                                              |
| 586296                                       | 2.61800                   | 0.56980                 | 0.00010               | mCG146987               | Gbp1                       | guanylate nucleotide binding protein 1                                                                                                                         |
| 847876                                       | 2.37220                   | 0.26840                 | 0.00000               | mCG122229               | Gbp2                       | guanylate nucleotide binding protein 2                                                                                                                         |
| 643417                                       | 2.17360                   | 0.64740                 | 0.00000               | mCG124141               | null                       | null                                                                                                                                                           |
| 616423                                       | 1.80620                   | 0.42350                 | 0.00000               | mCG20328.2              | 5830443L24Rik              | RIKEN cDNA 5830443L24 gene                                                                                                                                     |
| 405120                                       | 1.77250                   | 0.22730                 | 0.00000               | mCG21119.2              | Gbp4                       | guanylate nucleotide binding protein 4                                                                                                                         |
| 913926                                       | 1.72950                   | 0.51800                 | 0.00000               | mCG141961               | 9830147J24Rik              | RIKEN cDNA 9830147J24 gene                                                                                                                                     |
| 607896                                       | 1.33990                   | 0.28910                 | 0.00000               | mCG21470.1              | Ifit1                      | interferon-induced protein with tetratricopeptide repeats 1                                                                                                    |
| 732899                                       | 1.04450                   | 0.23180                 | 0.00000               | mCG141548               | Oasl2                      | 2'-5' oligoadenylate synthetase-like 2                                                                                                                         |
| 922460                                       | 0.97840                   | 0.09980                 | 0.00000               | mCG13768.1              | Irf1                       | interferon regulatory factor 1                                                                                                                                 |
| 414909                                       | 0.78410                   | 0.27060                 | 0.00020               | mCG6318.1               | Ifi203                     | interferon activated gene 203                                                                                                                                  |
| <b>MHCI-mediated immunity</b>                |                           |                         |                       |                         |                            |                                                                                                                                                                |
| PROBE                                        | LOG_Q[090514_J-K_ind.ma2] | VAR[090514_J-K_ind.ma2] | P[090514_J-K_ind.ma2] | Celera Gene ID          | Gene_Symbol                | Gene_Name                                                                                                                                                      |
| 712519                                       | 2.65430                   | 0.25200                 | 0.00000               | null                    | H2-Q8                      | histocompatibility 2, Q region locus 8                                                                                                                         |
| 320903                                       | 2.58600                   | 0.32230                 | 0.00000               | null                    | H2-Q1                      | histocompatibility 2, Q region locus 1                                                                                                                         |
| 780747                                       | 1.99790                   | 0.49670                 | 0.00010               | mCG127285.2             | LOC636147[Cd8a             | CD8 antigen, alpha chain                                                                                                                                       |
| 447264                                       | 1.95530                   | 0.48700                 | 0.00030               | mCG11758.2              | Ctsw                       | cathepsin W                                                                                                                                                    |
| 501966                                       | 1.57600                   | 0.44910                 | 0.00000               | mCG147911               | B2m                        | beta-2 microglobulin                                                                                                                                           |
| 908953                                       | 0.94240                   | 0.09150                 | 0.00000               | mCG11606.2              | B2m                        | beta-2 microglobulin                                                                                                                                           |
| 638437                                       | 0.88810                   | 0.06670                 | 0.00000               | mCG132391.2             | H2-T9 H2-T17 H2-T22 H2-T10 | histocompatibility 2, T region locus 9 histocompatibility 2, T region locus 17 histocompatibility 2, T region locus 22 histocompatibility 2, T region locus 10 |
| 847591                                       | 0.87240                   | 0.18830                 | 0.00000               | mCG134313.1             | Tapbp1                     | TAP binding protein-like                                                                                                                                       |
| 558496                                       | 0.79940                   | 0.13770                 | 0.00000               | mCG12223.1              | H2-T23                     | histocompatibility 2, T region locus 23                                                                                                                        |
| 675921                                       | 0.59630                   | 0.06190                 | 0.00000               | mCG120898.1             | LOC633897                  | null                                                                                                                                                           |
| <b>MHCII-mediated immunity</b>               |                           |                         |                       |                         |                            |                                                                                                                                                                |
| PROBE                                        | LOG_Q[090514_J-K_ind.ma2] | VAR[090514_J-K_ind.ma2] | P[090514_J-K_ind.ma2] | Celera Gene ID          | Gene_Symbol                | Gene_Name                                                                                                                                                      |
| 431279                                       | 2.56150                   | 0.38030                 | 0.00000               | mCG113208.1             | H2-Ea H2-Aa                | histocompatibility 2, class II antigen E alpha histocompatibility 2, class II antigen A, alpha                                                                 |
| 745275                                       | 2.54470                   | 0.18670                 | 0.00000               | mCG23016.2              | H2-DMa                     | histocompatibility 2, class II, locus DMa                                                                                                                      |
| 637912                                       | 2.27350                   | 0.18870                 | 0.00000               | mCG132704.1             | H2-Ab1 LOC641240           | histocompatibility 2, class II antigen A, beta 1                                                                                                               |
| 904963                                       | 2.25850                   | 0.40890                 | 0.00000               | mCG132703.2 mCG132689.1 | H2-DMb2 H2-DMb1            | histocompatibility 2, class II, locus Mb2 histocompatibility 2, class II, locus Mb1                                                                            |
| 775978                                       | 2.24760                   | 0.20400                 | 0.00000               | mCG6027.2               | Cd74                       | CD74 antigen (invariant polypeptide of major histocompatibility complex, class II antigen-associated)                                                          |
| 920968                                       | 2.22910                   | 0.24630                 | 0.00000               | mCG9940.2               | H2-Eb1                     | histocompatibility 2, class II antigen E beta                                                                                                                  |
| 522474                                       | 2.05370                   | 0.62000                 | 0.00000               | mCG126563.1             | C2ta                       | class II transactivator                                                                                                                                        |
| <b>Macrophage-mediated immunity</b>          |                           |                         |                       |                         |                            |                                                                                                                                                                |
| PROBE                                        | LOG_Q[090514_J-K_ind.ma2] | VAR[090514_J-K_ind.ma2] | P[090514_J-K_ind.ma2] | Celera Gene ID          | Gene_Symbol                | Gene_Name                                                                                                                                                      |
| 575878                                       | 4.39140                   | 0.41670                 | 0.00000               | mCG12528.2              | Cxcl9                      | chemokine (C-X-C motif) ligand 9                                                                                                                               |
| 930152                                       | 3.26280                   | 0.49470                 | 0.00000               | mCG12531.2              | Cxcl10                     | chemokine (C-X-C motif) ligand 10                                                                                                                              |
| 586296                                       | 2.61800                   | 0.56980                 | 0.00010               | mCG146987               | Gbp1                       | guanylate nucleotide binding protein 1                                                                                                                         |
| 847876                                       | 2.37220                   | 0.26840                 | 0.00000               | mCG122229               | Gbp2                       | guanylate nucleotide binding protein 2                                                                                                                         |
| 616423                                       | 1.80620                   | 0.42350                 | 0.00000               | mCG20328.2              | 5830443L24Rik              | RIKEN cDNA 5830443L24 gene                                                                                                                                     |
| 456277                                       | 1.78790                   | 0.37940                 | 0.00000               | mCG8631.2               | Fcgr3a                     | Fc fragment of IgG, low affinity IIIa, receptor                                                                                                                |
| 405120                                       | 1.77250                   | 0.22730                 | 0.00000               | mCG21119.2              | Gbp4                       | guanylate nucleotide binding protein 4                                                                                                                         |
| 913926                                       | 1.72950                   | 0.51800                 | 0.00000               | mCG141961               | 9830147J24Rik              | RIKEN cDNA 9830147J24 gene                                                                                                                                     |
| 351046                                       | 1.32030                   | 0.18470                 | 0.00000               | mCG132214.1             | Clec4a1                    | C-type lectin domain family 4, member a1                                                                                                                       |
| 355529                                       | 1.15290                   | 0.20110                 | 0.00000               | mCG132215.1             | Clec4a3                    | C-type lectin domain family 4, member a3                                                                                                                       |
| 649745                                       | 0.92060                   | 0.38690                 | 0.00100               | mCG8629.2               | Fcgr3                      | Fc receptor, IgG, low affinity III                                                                                                                             |
| 774411                                       | 0.86170                   | 0.23540                 | 0.00000               | mCG144561               | Alox5ap                    | arachidonate 5-lipoxygenase activating protein                                                                                                                 |
| <b>Natural killer cell mediated immunity</b> |                           |                         |                       |                         |                            |                                                                                                                                                                |
| PROBE                                        | LOG_Q[090514_J-K_ind.ma2] | VAR[090514_J-K_ind.ma2] | P[090514_J-K_ind.ma2] | Celera Gene ID          | Gene_Symbol                | Gene_Name                                                                                                                                                      |
| 550292                                       | 5.23590                   | 1.24620                 | 0.00000               | mCG4516.2               | Gzma                       | granzyme A                                                                                                                                                     |
| 447264                                       | 1.95530                   | 0.48700                 | 0.00030               | mCG11758.2              | Ctsw                       | cathepsin W                                                                                                                                                    |

Supplemental Table 3

|                                 |                           |                         |                       |                         |                              |                                                                                                                                                                |
|---------------------------------|---------------------------|-------------------------|-----------------------|-------------------------|------------------------------|----------------------------------------------------------------------------------------------------------------------------------------------------------------|
| 456277                          | 1.78790                   | 0.37940                 | 0.00000               | mCG8631.2               | Fcgr3a                       | Fc fragment of IgG, low affinity IIIa, receptor                                                                                                                |
| 736887                          | 1.21900                   | 0.11950                 | 0.00000               | mCG22139.1              | Nkg7                         | natural killer cell group 7 sequence                                                                                                                           |
| 800022                          | 0.96700                   | 0.18650                 | 0.00000               | mCG22805.2              | Tyrobp                       | TYRO protein tyrosine kinase binding protein                                                                                                                   |
| 649745                          | 0.92060                   | 0.38690                 | 0.00100               | mCG8629.2               | Fcgr3                        | Fc receptor, IgG, low affinity III                                                                                                                             |
| 323019                          | 0.65580                   | 0.08400                 | 0.00000               | mCG132542.2             | Clec2h                       | C-type lectin domain family 2, member h                                                                                                                        |
| <b>T-cell mediated immunity</b> |                           |                         |                       |                         |                              |                                                                                                                                                                |
| PROBE                           | LOG_Q[090514_J-K_ind.ma2] | VAR[090514_J-K_ind.ma2] | P[090514_J-K_ind.ma2] | Celera Gene ID          | Gene_Symbol                  | Gene_Name                                                                                                                                                      |
| 550292                          | 5.23590                   | 1.24620                 | 0.00000               | mCG4516.2               | Gzma                         | granzyme A                                                                                                                                                     |
| 712519                          | 2.65430                   | 0.25200                 | 0.00000               | null                    | H2-Q8                        | histocompatibility 2, Q region locus 8                                                                                                                         |
| 320903                          | 2.58600                   | 0.32230                 | 0.00000               | null                    | H2-Q1                        | histocompatibility 2, Q region locus 1                                                                                                                         |
| 431279                          | 2.56150                   | 0.38030                 | 0.00000               | mCG113208.1             | H2-Ea H2-Aa                  | histocompatibility 2, class II antigen E alpha histocompatibility 2, class II antigen A, alpha                                                                 |
| 745275                          | 2.54470                   | 0.18670                 | 0.00000               | mCG23016.2              | H2-DMa                       | histocompatibility 2, class II, locus DMA                                                                                                                      |
| 637912                          | 2.27350                   | 0.18870                 | 0.00000               | mCG132704.1             | H2-Ab1 LOC641240             | histocompatibility 2, class II antigen A, beta 1                                                                                                               |
| 904963                          | 2.25850                   | 0.40890                 | 0.00000               | mCG132703.2 mCG132689.1 | H2-DMb2 H2-DMb1              | histocompatibility 2, class II, locus Mb2 histocompatibility 2, class II, locus Mb1                                                                            |
| 775978                          | 2.24760                   | 0.20400                 | 0.00000               | mCG6027.2               | Cd74                         | CD74 antigen (invariant polypeptide of major histocompatibility complex, class II antigen-associated)                                                          |
| 920968                          | 2.22910                   | 0.24630                 | 0.00000               | mCG9940.2               | H2-Eb1                       | histocompatibility 2, class II antigen E beta                                                                                                                  |
| 522474                          | 2.05370                   | 0.62000                 | 0.00000               | mCG126563.1             | C2ta                         | class II transactivator                                                                                                                                        |
| 780747                          | 1.99790                   | 0.49670                 | 0.00010               | mCG127285.2             | LOC636147 Cd8a               | CD8 antigen, alpha chain                                                                                                                                       |
| 742215                          | 1.96190                   | 0.23130                 | 0.00000               | mCG8696.2               | Tcra LOC545051 A430107P09Rik | T-cell receptor alpha chain RIKEN cDNA A430107P09 gene                                                                                                         |
| 447264                          | 1.95530                   | 0.48700                 | 0.00030               | mCG11758.2              | Ctsw                         | cathepsin W                                                                                                                                                    |
| 840423                          | 1.78240                   | 0.29170                 | 0.00000               | mCG1551.2               | Cd3g                         | CD3 antigen, gamma polypeptide                                                                                                                                 |
| 453230                          | 1.74770                   | 0.32150                 | 0.00000               | mCG1536.1               | Cd3d                         | CD3 antigen, delta polypeptide                                                                                                                                 |
| 501966                          | 1.57600                   | 0.44910                 | 0.00000               | mCG147911               | B2m                          | beta-2 microglobulin                                                                                                                                           |
| 440084                          | 1.07700                   | 0.18760                 | 0.00000               | mCG9108.1               | Cd274                        | CD274 antigen                                                                                                                                                  |
| 812669                          | 1.06680                   | 0.25910                 | 0.00010               | mCG3074.1               | Cd1d1                        | CD1d1 antigen                                                                                                                                                  |
| 908953                          | 0.94240                   | 0.09150                 | 0.00000               | mCG11606.2              | B2m                          | beta-2 microglobulin                                                                                                                                           |
| 638437                          | 0.88810                   | 0.06670                 | 0.00000               | mCG132391.2             | H2-T9 H2-T17 H2-T22 H2-T10   | histocompatibility 2, T region locus 9 histocompatibility 2, T region locus 17 histocompatibility 2, T region locus 22 histocompatibility 2, T region locus 10 |
| 847591                          | 0.87240                   | 0.18830                 | 0.00000               | mCG134313.1             | Tapbp1                       | TAP binding protein-like                                                                                                                                       |
| 558496                          | 0.79940                   | 0.13770                 | 0.00000               | mCG12223.1              | H2-T23                       | histocompatibility 2, T region locus 23                                                                                                                        |
| 334297                          | 0.71020                   | 0.20460                 | 0.00010               | null                    | Cd99                         | CD99 antigen                                                                                                                                                   |
| 675921                          | 0.59630                   | 0.06190                 | 0.00000               | mCG120898.1             | LOC633897                    | null                                                                                                                                                           |
